1 Sentinel Cards Provide Practical SARS-CoV-2 Monitoring in School Settings

2

3 Victor J Cantú<sup>\*1</sup>, Karenina Sanders<sup>\*2</sup>, Pedro Belda-Ferre<sup>2,3</sup>, Rodolfo A Salido<sup>1</sup>, Rebecca

4 Tsai<sup>2</sup>, Brett Austin<sup>4</sup>, William Jordan<sup>4</sup>, Menka Asudani<sup>4</sup>, Amanda Walster<sup>4</sup>, Celestine G.

5 Magallanes<sup>5,6</sup>, Holly Valentine<sup>5,6</sup>, Araz Manjooian<sup>7,8</sup>, Carrissa Wijaya<sup>7</sup>, Vinton

6 Omaleki<sup>7</sup>, Stefan Aigner<sup>3,6,9</sup>, Nathan A Baer<sup>3</sup>, Maryann Betty<sup>2,3,10</sup>, Anelizze Castro-

7 Martínez<sup>3</sup>, Willi Cheung<sup>3,6,8</sup>, Peter De Hoff<sup>3,5,6</sup>, Emily Eisner<sup>3</sup>, Abbas Hakim<sup>3</sup>, Alma L

8 Lastrella<sup>3</sup>, Elijah S Lawrence<sup>3</sup>, Toan T Ngo<sup>3</sup>, Tyler Ostrander<sup>3</sup>, Ashley Plascencia<sup>3</sup>,

9 Shashank Sathe<sup>3,6,9</sup>, Elizabeth W Smoot<sup>3</sup>, Aaron F Carlin<sup>11</sup>, Gene W Yeo<sup>3,6,9</sup>, Louise C

10 Laurent<sup>5,6</sup>, Anna Liza Manlutac<sup>4</sup>, Rebecca Fielding-Miller<sup>7,14</sup>, Rob Knight<sup>1,12-14</sup>

11

12

13 1. Department of Bioengineering, University of California, San Diego, La Jolla, CA

14 92093, USA

15 2. Department of Pediatrics, University of California San Diego, La Jolla, CA

16 3. Expedited COVID Identification Environment (EXCITE) Laboratory, Department

17 of Pediatrics, University of California San Diego, La Jolla, CA

18 4. San Diego County Public Health Lab, San Diego, CA

19 5. Department of Obstetrics, Gynecology, and Reproductive Sciences, University of

20 California San Diego, USA

21 6. Sanford Consortium of Regenerative Medicine, University of California San

22 Diego, La Jolla, CA

- 23 7. Herbert Wertheim School of Public Health, University of California, San Diego  
24 9500 Gilman Drive, La Jolla, CA 92093
- 25 8. San Diego State University, San Diego, CA
- 26 9. Dept of Cellular and Molecular Medicine, University of California San Diego, La  
27 Jolla, CA
- 28 10. Rady Children's Hospital, San Diego, CA
- 29 11. Division of Infectious Diseases and Global Public Health, Department of  
30 Medicine; University of California San Diego School of Medicine, 9500 Gilman  
31 Drive, La Jolla, California 92093, USA
- 32 12. Department of Computer Science and Engineering, University of California San  
33 Diego, La Jolla, CA, USA
- 34 13. Center for Microbiome Innovation, Jacobs School of Engineering, University of  
35 California San Diego, La Jolla, CA, USA
- 36 14. Co-corresponding authors

37

38 Running Head: Sentinel Cards Provide Practical SARS-CoV-2 Monitoring

39

40 #Address correspondence to Rob Knight, [rknight@health.ucsd.edu](mailto:rknight@health.ucsd.edu)

41

42 \*Victor J Cantú and Karenina Sanders contributed equally to this work. Author order was  
43 determined alphabetically.

44

45 Abstract

46 Accurate, high-resolution environmental monitoring of SARS-CoV-2 traces indoors  
47 through sentinel cards is a promising approach to help students safely return to in-  
48 person learning. Because SARS-CoV-2 RNA can persist for up to a week on several  
49 indoor surface types, there is a need for increased temporal resolution to determine  
50 whether consecutive surface positives arise from new infection events or continue to  
51 report past events. Cleaning sentinel cards after sampling would provide the needed  
52 resolution, but might interfere with assay performance. We tested the effect of three  
53 cleaning solutions (BZK wipes, wet wipes, RNase Away) at three different viral loads:  
54 “high” ( $4 \times 10^4$  GE/mL), “medium” ( $1 \times 10^4$  GE/mL), and “low” ( $2.5 \times 10^3$  GE/mL). RNase  
55 Away, chosen as a positive control, was the most effective cleaning solution on all three  
56 viral loads. Wet wipes were found to be more effective than BZK wipes in the medium  
57 viral load condition. The low viral load condition was easily reset with all three cleaning  
58 solutions. These findings will enable temporal SARS-CoV-2 monitoring in indoor  
59 environments where transmission risk of the virus is high and the need to avoid  
60 individual-level sampling for privacy or compliance reasons exists.

61

62 Importance

63 Because SARS-CoV-2, the virus that causes COVID-19, persists on surfaces, testing  
64 swabs taken from surfaces is useful as a monitoring tool. This approach is especially  
65 valuable in school settings, where there are cost and privacy concerns that are  
66 eliminated by taking a single sample from a classroom. However, the virus persists for  
67 days to weeks on surface samples, so it is impossible to tell whether positive detection

68 events on consecutive days are persistent signal or new infectious cases, and therefore  
69 whether the positive individuals have been successfully removed from the classroom.  
70 We compare several methods for cleaning “sentinel cards” to show that this approach  
71 can be used to identify new SARS-CoV-2 signals day to day. The results are important  
72 for determining how to monitor classrooms and other indoor environments for SARS-  
73 CoV-2 virus.

74

75 Body

76 For the last two years, the SARS-CoV-2 pandemic has disrupted lives and caused  
77 millions of deaths globally. Due to the high risk of virus transmission in indoor settings,  
78 schools have been forced to convert to remote learning [1]. Although remote learning  
79 can be convenient for some, not every child has access to a stable internet connection  
80 and a supportive, quiet learning environment [2,3]. Therefore, most child health  
81 authorities are recommending a return to in-person learning, if it can be conducted  
82 safely [4]. Effective SARS-CoV-2 monitoring is crucial to allow for in-person learning to  
83 resume safely and widely [5], with the goal of restoring education equity. However,  
84 performing daily nasal swabs to monitor the spread of the disease has high financial  
85 and labor costs, and often runs into difficulties with consent and reporting of results to  
86 relevant public health authorities.

87

88 Wastewater and environmental monitoring strategies have been developed [6-8] and  
89 implemented [9] as a means of circumventing clinical swabs. We have already  
90 demonstrated that viral signals from COVID-19 patients in indoor environments

91 commonly accumulate on high-touch surfaces and the floors in front of features with  
92 high interaction times [8]. Additionally, SARS-CoV-2 RNA has been demonstrated to  
93 persist for up to a week on several indoor surface types [7, 10], making it difficult to  
94 understand exactly when an infected individual came into contact with a surface or if  
95 consecutive positives are from new deposition events. Thus, an effective post-sampling  
96 cleaning procedure needs to be established in order to increase temporal resolution and  
97 ensure that consecutive positives are from new infection events.

98

99 To increase the temporal resolution of proven environmental pipelines [9,11] we tested  
100 resetting SARS-CoV-2 RNA signal with a mock sentinel surface. Here, a sentinel  
101 surface is a surface used as an environmental monitoring tool for detecting whether or  
102 not an infected individual was recently present in an indoor space. The mock sentinel  
103 surfaces we used were 100 cm<sup>2</sup> laminated cards. The sentinel cards were inoculated  
104 with 10 µL of a dilution series of heat-inactivated SARS-CoV-2 particles (strain WA-1,  
105 SA-WA1/2020) in water and then wiped with a cleaning solution each day for five days.  
106 Samples were collected by swabbing the sentinel cards pre-inoculation, post-  
107 inoculation, and post-wipe (Supplemental Fig. S1).

108

109 For this study we used three viral loads: “high” ( $4 \times 10^4$ ), “medium” ( $1 \times 10^4$ ), and “low”  
110 ( $2.5 \times 10^3$ ) dilutions of SARS-CoV-2 viral genomic equivalents, as measured by droplet  
111 digital PCR. These concentrations were chosen to bracket the ranges we typically  
112 observed in classrooms during SASEA [9]. We used two different transport media: SDS  
113 (0.5% w/v sodium dodecyl sulfate (SDS), Acros Organics, 230420025), which we have

114 previously shown to yield superior results in SARS-CoV-2 molecular assays [County  
115 paper], and VTM (Viral Transport Medium, NEST Scientific USA, 202016), which is in  
116 widespread use by public health laboratories. We tested three cleaning methods:  
117 benzalkonium chloride (BZK) antiseptic towelettes (Dynarex, 1331), moist wet wipe  
118 (WW) towelettes (Royal, RF1MB), and paper towels moistened with RNase AWAY (RA)  
119 (ThermoFisher Scientific, 10328011).

120

121 To continue benchmarking proven environmental pipelines [7, 9, 11] and to account for  
122 potential interactions, we used a factorial study design covering two swabbing media  
123 (SDS, VTM), three cleaning solutions (BZK wipes, wet wipes, RNase Away) and three  
124 viral spike-in concentrations (High, Medium, Low). Each condition was performed in  
125 triplicate for a total of 54 cards. A three-step swabbing process was performed on each  
126 card over a five-day period. First, we swabbed each card at the start of the day (Step 1).  
127 Next, the viral spike-in was added to the card and a second swab was collected (Step  
128 2). The card was then wiped with the cleaning solution and a final swab was collected  
129 (Step 3). Extraction and RT-qPCR were performed as described in our previous work,  
130 with VTM samples processed by the Perkin-Elmer pipeline and SDS samples  
131 processed by the Thermo pipeline described in that work [PHL paper].

132

133 Our results demonstrated that all of the cleaning methods worked well at low viral load  
134 over 5 cleaning cycles, although cleaning failures were somewhat more frequent with  
135 BZK (Fig. 1). Wet wipes and BZK performed well with SDS at medium viral loads, but  
136 only wet wipes performed well with VTM under these conditions. At high viral loads, only

137 the combination of RNase away and SDS was able to remove the signal. Therefore, we  
138 recommend that if high viral loads ( $Cq < 30$ , with SDS) are detected on a sentinel card,  
139 that the sentinel card be replaced at the next opportunity rather than cleaned. Repeat  
140 cleaning did not degrade the sentinel card surface or the ability to detect signal. As  
141 expected from our past work [11], SDS returned lower  $Cq$  values (better signal) than  
142 VTM on the same samples.

143

144 An important consideration is the number of distinct genes recovered as matching in the  
145 RT-qPCR process, as this can make the difference between a sample being called as  
146 SARS-CoV-2 positive versus invalid. Because the peaks with the same viral load  
147 applied were highly reproducible across multiple days (reaching the same height in Fig.  
148 1), for this analysis we could treat each day as a replicate of the pre-application, post-  
149 application, and post-cleaning sample conditions that were collected on each day. Fig. 2  
150 shows the reproducibility of replicates with cleaning, including the number of genes  
151 amplified. Under low load conditions, as expected, cleaning was effective and non-zero  
152 values occurred nearly always post-application and disappeared on cleaning, with the  
153 exception of VTM samples which sometimes carried over (right hand column in Fig 2).  
154 In contrast, in the high load condition (left hand column in Fig. 2), cleaning was nearly  
155 always ineffective except with RNase Away, not practical for classroom use. In the  
156 medium condition (middle column), all cleaning methods were effective with SDS but  
157 none were effective with VTM – the slightly higher cluster of  $Cq$  values are obtained with  
158 VTM in each case, consistent with expectations and with Fig. 1. Because VTM is  
159 viscous and contains fetal calf serum, a noticeable film developed on the sentinel cards,

160 and we suspect that vigorous and repeated cleaning beyond what is achievable with  
161 wipes may be required to remove all of it.

162

163 Taken together, these results indicate that sentinel cards are an effective and practical  
164 solution for SARS-CoV-2 classroom monitoring, but that they must be cleaned carefully  
165 in order to remove carryover signal, and this process is easier with samples collected in  
166 SDS than in VTM (although cleaning with VTM is still possible). Because removing high  
167 viral load from sentinel cards is challenging, strong positives should be removed rather  
168 than cleaned. These findings are an important step to deployment of these cards at  
169 scale in projects such as SASEA.

170

## 171 References

- 172 1. Black E, Ferdig R, Thompson LA. 2021. K-12 Virtual Schooling, COVID-19, and  
173 Student Success. *JAMA pediatrics* 175:119–120.
- 174 2. van Lancker W, Parolin Z. 2020. COVID-19, school closures, and child poverty: a  
175 social crisis in the making. *The Lancet Public Health* 5:e243–e244.
- 176 3. White A, Liburd LC, Coronado F. 2021. Addressing Racial and Ethnic Disparities  
177 in COVID-19 Among School-Aged Children: Are We Doing Enough? *Preventing*  
178 *chronic disease* 18:1–11.
- 179 4. Rubin D, Coffin S, Fisher B, Gerber J, Matone M. 2022. Guidance for In-person  
180 Education in K-12 Educational Settings. Children’s Hospital of Philadelphia.



- 181 5. Johnson KE, Stoddard M, Nolan RP, White DE, Hochberg NS, Chakravarty A.  
182 2021. In the long shadow of our best intentions: Model-based assessment of the  
183 consequences of school reopening during the COVID-19 pandemic. *PLoS one* 16.
- 184 6. Karthikeyan S, Nguyen A, McDonald D, Zong Y, Ronquillo N, Ren J, Zou J,  
185 Farmer S, Humphrey G, Henderson D, Javidi T, Messer K, Anderson C,  
186 Schooley R, Martin NK, Knight R. 2021. Rapid, Large-Scale Wastewater  
187 Surveillance and Automated Reporting System Enable Early Detection of Nearly  
188 85% of COVID-19 Cases on a University Campus. *mSystems* 6.
- 189 7. Salido RA, Cantú VJ, Clark AE, Leibel SL, Foroughshafiei A, Saha A, Hakim A,  
190 Nouri A, Lastrella AL, Castro-Martínez A, Plascencia A, Kapadia BK, Xia B, Ruiz  
191 CA, Marotz CA, Maunder D, Lawrence ES, Smoot EW, Eisner E, Crescini ES,  
192 Kohn L, Franco Vargas L, Chacón M, Betty M, Machnicki M, Wu MY, Baer NA,  
193 Belda-Ferre P, de Hoff P, Seaver P, Ostrander RT, Tsai R, Sathe S, Aigner S,  
194 Morgan SC, Ngo TT, Barber T, Cheung W, Carlin AF, Yeo GW, Laurent LC,  
195 Fielding-Miller R, Knight R. 2021. Analysis of SARS-CoV-2 RNA Persistence  
196 across Indoor Surface Materials Reveals Best Practices for Environmental  
197 Monitoring Programs. *mSystems* 6.
- 198 8. Cantú VJ, Salido RA, Huang S, Rahman G, Tsai R, Valentine H, Magallanes CG,  
199 Aigner S, Baer NA, Barber T, Belda-Ferre P, Betty M, Bryant M, Casa-Maya M,  
200 Castro-Martínez, Chacón M, Cheung W, Crescini ES, de Hoff P, Eisner E,  
201 Farmer S, Hakim A, Kohn L, Lastrella AL, Lawrence ES, Morgan SC, Ngo TT,  
202 Nouri A, Plascencia A, Ruiz CA, Sathe S, Seaver P, Shwartz T, Smoot EW,  
203 Ostrander T, Valles T, Yeo GW, Laurent LC, Fielding-Miller R, Knight R. (2021).

- 204 SARS-CoV-2 Distribution in Residential Housing Suggests Contact Deposition  
205 and Correlates with *Rothia* sp. (submitted for publication).
- 206 9. Fielding-Miller R, Karthikeyan S, Gaines T, Garfein RS, Salido R, Cantu V, Kohn  
207 L, Martin NK, Wijaya C, Flores M, Omaleki V, Manjooian A, Gonzalez-Zuniga P,  
208 Nguyen M, Vo A v, Le T, Duong D, Hassani A, Dahl A, Tweeten S, Jepsen K,  
209 Henson B, Hakim A, Birmingham A, Mark AM, Nasamran CA, Rosenthal SB,  
210 Moshiri N, Fisch KM, Humphrey G, Farmer S, Tubb HM, Valles T, Morris J, Kang  
211 J, Khaleghi B, Young C, Akel AD, Eilert S, Eno J, Curewitz K, Laurent LC, Rosing  
212 T, SEARCH, Knight R. 2021. Wastewater and surface monitoring to detect  
213 COVID-19 in elementary school settings: The Safer at School Early Alert project.  
214 medRxiv : the preprint server for health sciences  
215 <https://doi.org/10.1101/2021.10.19.21265226>.
- 216 10. Renninger N, Nastasi N, Bope A, Cochran SJ, Haines SR, Balasubrahmaniam N,  
217 Stuart K, Bivins A, Bibby K, Hull NM, Dannemiller KC. 2021. Indoor Dust as a  
218 Matrix for Surveillance of COVID-19. *mSystems* 6.
- 219 11. Cantú VJ, Belda-Ferre P, Salido RA, Tsai R, Austin B, Jordan W, Asudani M,  
220 Walster A, Magallanes CG, Valentine H, Manjooian A, Wijaya C, Omaleki V,  
221 Sanders K, Aigner S, Baer NA, Betty M, Castro-Martínez A, Chacón M, Cheung  
222 W, Crescini ES, de Hoff P, Eisner E, Hakim A, Kapadia B, Lastrella AL,  
223 Lawrence ES, Ngo TT, Ostrander T, Sathe S, Seaver P, Smoot EW, Carlin AF,  
224 Yeo GW, Laurent LC, Manlutac AL, Fielding-Miller R, Knight R. 2022.  
225 Implementation of Practical Surface SARS-CoV-2 Surveillance in School Settings  
226 (submitted for publication).

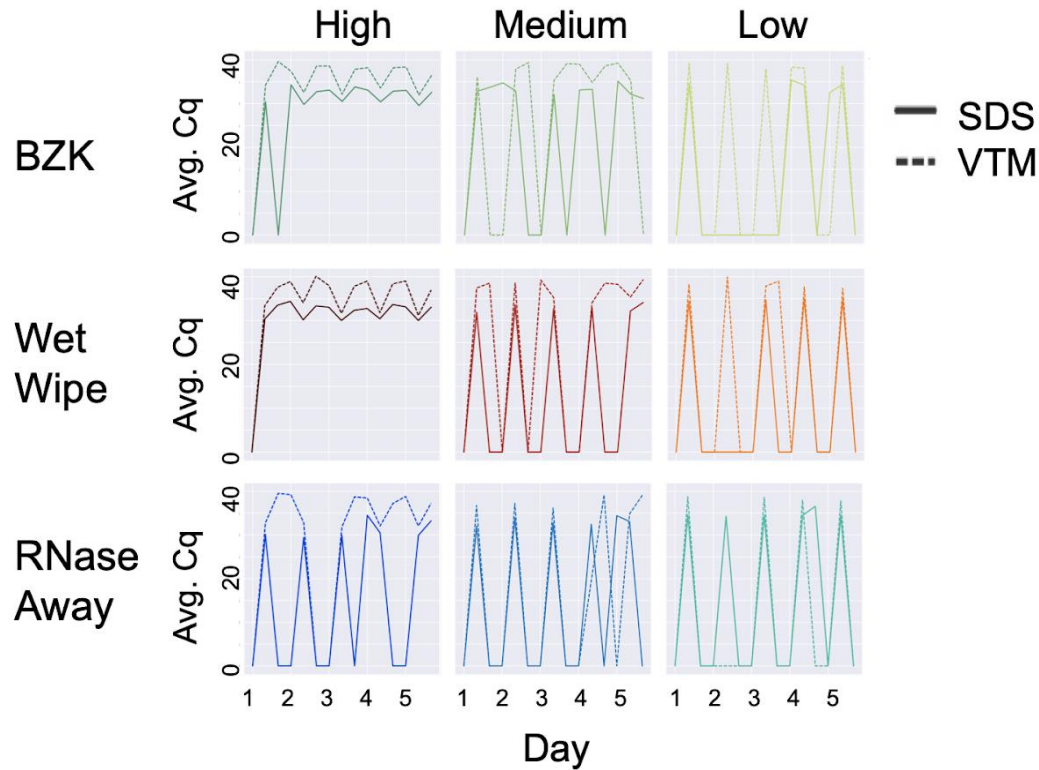

227

228 Figure 1. Effect of cleaning solution at high, medium and low viral load with different  
229 swabbing media. On each day, three samples were taken: (1) before addition of viral  
230 particles, (2) after addition, and (3) after cleaning. Therefore, the expected pattern is a  
231 train of 5 spikes, starting at zero, rising to the maximum Cq value, returning to zero the  
232 same day, and staying at zero until the next day, as seen for SDS in the low load  
233 condition with RNase away (bottom right panel, solid lines). High, medium, and low  
234 viral load were defined as ( $4 \times 10^4$ ), ( $1 \times 10^4$ ), and ( $2.5 \times 10^3$ ), respectively. Average Cq  
235 (Avg. Cq) was calculated as a mean Cq value from three samples. Two viral transport  
236 media were tested: SDS (0.5% w/v sodium dodecyl sulfate (SDS) and VTM (Viral  
237 Transport Medium). Effective cleaning reset Cq for each day. RNase away was shown  
238 to be effective at each viral load, whereas benzalkonium chloride (BZK) and wet wipes  
239 were only effective at medium and low viral load.

240

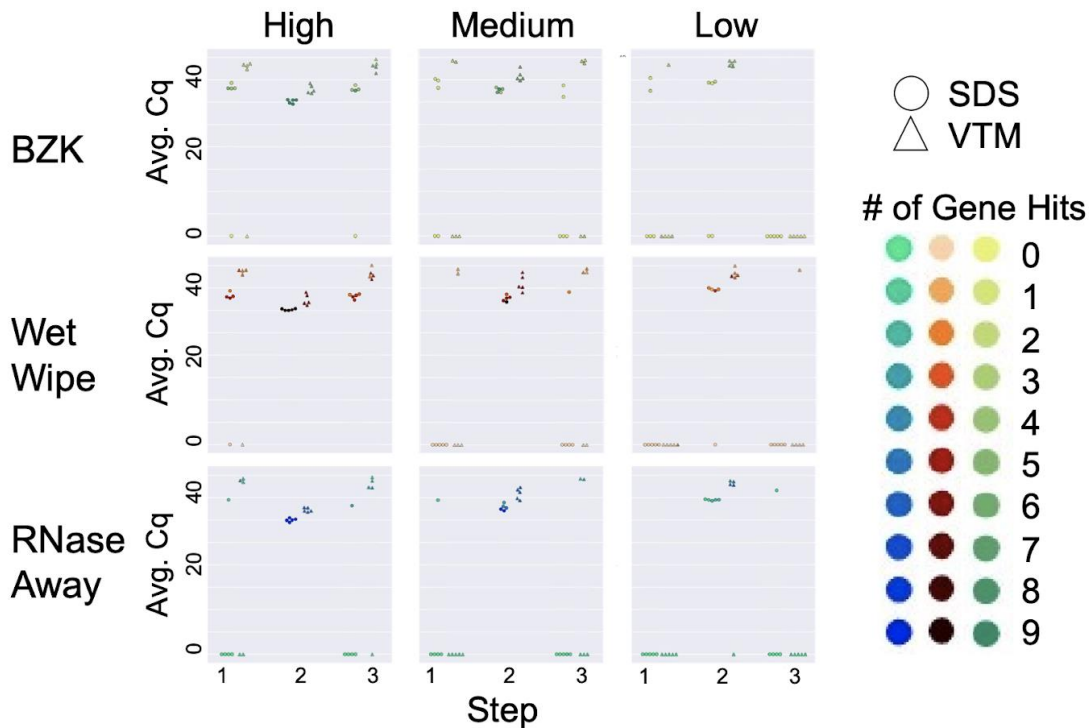

241

242

243 Figure 2. Cleaning solution efficiency after deliberate addition of viral load. Sampling  
244 was performed in three steps: initial virus amount (blank) was sampled from the wall for  
245 Step 1. Virus was deliberately loaded on the surface and sampled for Step 2. The  
246 surface was cleaned with different cleaning methods and sampled for qPCR analysis for  
247 Step 3. High, medium, and low viral load were defined as ( $4 \times 10^4$ ), ( $1 \times 10^4$ ), and ( $2.5 \times$   
248  $10^3$ ), respectively. Average Cq (Avg. Cq) was calculated as a mean Cq value from three  
249 samples. Two viral transport media were tested: SDS (0.5% w/v sodium dodecyl sulfate  
250 (SDS) and VTM (Viral Transport Medium). Effective cleaning reset Cq for each day  
251 (steps 1 and 3), whereas ineffective cleaning retained high viral load (non-zero Cq) at  
252 these steps. The number of gene hits refers to how many gene targets were amplified  
253 during RT-qPCR across the triplicate samples: the qPCR method for the SDS samples

254 targeted 3 genes for a total of 9 possible genes amplified while the method for the VTM  
255 samples targeted 2 genes for a total of 6 possible gene hits.

256

257 Acknowledgements

258 This research was supported by NIH grant (K01MH112436) to RFM, the County of San  
259 Diego Health and Human Services Agency (Contract 563236), and the Career Award  
260 for Medical Scientists from the Burroughs Wellcome Fund to A.F.C. We thank Marisol  
261 Chacon, Evelyn S Crescini, Bhavika Kapadia, Sydney C. Morgan, Alhakam Nouri,  
262 Christopher A. Ruiz, Phoebe Seaver, and Lizbeth Franco Vargas for their support with  
263 environmental SARS-CoV-2 detection as part of the EXCITE Lab.

264

265 The following reagent was deposited by the Centers for Disease Control and Prevention  
266 and obtained through BEI Resources, NIAID, NIH: SARS-Related Coronavirus 2, Isolate  
267 USA-WA1/2020, NR-52281.

268

269 Supplemental Fig. S1

270 Diagram of sampling events for each day of the experiment. Each day the sentinel

271 cards were swabbed pre- and post-inoculation and post wiping.
